# Supplementary material
Source: PubMed Central journal article supplement (PMC8118842)
Supplement: A0998.pdf [file A0998.pdf]

**On-line Table 1:  $\kappa$  value of intraobserver and interobserver variability of ROI-based analysis**

| ROI  | Averaged Intraobserver Agreements |      |             |             |             | Averaged Interobserver Agreements |      |             |             |             |
|------|-----------------------------------|------|-------------|-------------|-------------|-----------------------------------|------|-------------|-------------|-------------|
|      | FA                                | ADC  | $\lambda_1$ | $\lambda_2$ | $\lambda_3$ | FA                                | ADC  | $\lambda_1$ | $\lambda_2$ | $\lambda_3$ |
| CST  | 0.40                              | 0.41 | 0.30        | 0.47        | 0.28        | 0.36                              | 0.38 | 0.57        | 0.42        | 0.56        |
| MCP  | 0.31                              | 0.35 | 0.17        | 0.09        | 0.26        | 0.30                              | 0.61 | 0.25        | 0.39        | 0.45        |
| ALIC | 0.09                              | 0.31 | 0.14        | 0.18        | 0.26        | 0.41                              | 0.33 | 0.21        | 0.33        | 0.32        |
| PLIC | 0.08                              | 0.25 | 0.17        | 0.14        | 0.14        | 0.31                              | 0.57 | 0.29        | 0.34        | 0.43        |
| GIC  | 0.26                              | 0.30 | 0.12        | 0.25        | 0.17        | 0.52                              | 0.55 | 0.24        | 0.41        | 0.43        |
| CCG  | 0.62                              | 0.53 | 0.50        | 0.34        | 0.33        | 0.51                              | 0.45 | 0.66        | 0.53        | 0.44        |
| CCS  | 0.43                              | 0.27 | 0.52        | 0.14        | 0.24        | 0.30                              | 0.40 | 0.58        | 0.32        | 0.29        |
| CSO  | 0.13                              | 0.22 | 0.21        | 0.21        | 0.12        | 0.06                              | 0.55 | 0.30        | 0.46        | 0.24        |

**Note:**—ROI indicates region of interest; FA, fractional anisotropy; ADC, apparent diffusion constant;  $\lambda_1$ , eigenvalue 1;  $\lambda_2$ , eigenvalue 2;  $\lambda_3$ , eigenvalue 3; CST, corticospinal tract; MCP, middle cerebellar peduncle; ALIC, anterior limb of the internal capsule; PLIC, posterior limb of the internal capsule; GIC, genu of the internal capsule; CSO, centrum semiovale; CCS, splenium of corpus callosum; CCG, genu of the corpus callosum.

**On-line Table 2: The overall average percent variability between the mean of the 2 readings of each observer and interobserver readings**

| Location    | Observer 1:<br>First and Second<br>Reading |       | Observer 2:<br>First and Second<br>Reading |       | Observer 1 and 2:<br>First and First<br>Reading |       | Observer 1 and 2:<br>Second and Second<br>Reading |       |
|-------------|--------------------------------------------|-------|--------------------------------------------|-------|-------------------------------------------------|-------|---------------------------------------------------|-------|
|             | Least*                                     | Most* | Least*                                     | Most* | Least*                                          | Most* | Least*                                            | Most* |
| ADC         | CSO                                        | ALIC  | CSO                                        | CCS   | CCG                                             | MCP   | CSO                                               | Th    |
|             | 1.9%                                       | 7.0%  | 3.3%                                       | 7.0%  | 3.5%                                            | 12.5% | 1.2%                                              | 13.2% |
| FA          | CCG                                        | Pt    | CCG                                        | CSO   | CCG                                             | Pt    | CCG                                               | Th    |
|             | 2.6%                                       | 16.0% | 1.6%                                       | 17.3% | 1.9%                                            | 24.9% | 0.0%                                              | 5.27% |
| $\lambda_1$ | PLIC                                       | ALIC  | ICG                                        | Pt    | CCG                                             | ALIC  | CCS                                               | ALIC  |
|             | 3.1%                                       | 9.4%  | 2.4%                                       | 8.4%  | 3.1%                                            | 12.6% | 0.1%                                              | 14.1% |
| $\lambda_2$ | Pt                                         | CCS   | Th                                         | CCS   | Pt                                              | MCP   | CCG                                               | Th    |
|             | 5.2%                                       | 14.9% | 5.4%                                       | 16.8% | 6.9%                                            | 18.2% | 5.1%                                              | 27.6% |
| $\lambda_3$ | Pt                                         | CCS   | Th                                         | CSO   | Th                                              | MCP   | CCG                                               | Pt    |
|             | 6.5%                                       | 23.0% | 6.6%                                       | 19.2% | 8.2%                                            | 33.4% | 9.0%                                              | 32.5% |

**Note:**—FA indicates fractional anisotropy; ADC, apparent diffusion constant;  $\lambda_1$ , eigenvalue 1;  $\lambda_2$ , eigenvalue 2;  $\lambda_3$ , eigenvalue 3; MCP, middle cerebellar peduncle; ALIC, anterior limb of the internal capsule; PLIC, posterior limb of the internal capsule; ICG, genu of the internal capsule; CSO, centrum semiovale; Th, thalamus; Pt, putamen; CCS, splenium of corpus callosum; CCG, genu of the corpus callosum.

\* Percentage of variability.
